# Supplementary material
Source: HighWire-hosted journal article supplement (https://ejhp.bmj.com/content/30/3/160)

**SUPPLEMENTARY FILE 5**

**Sterile holder for syringes and needles, which can be used inside LAF/SC instead of a sterile pad**

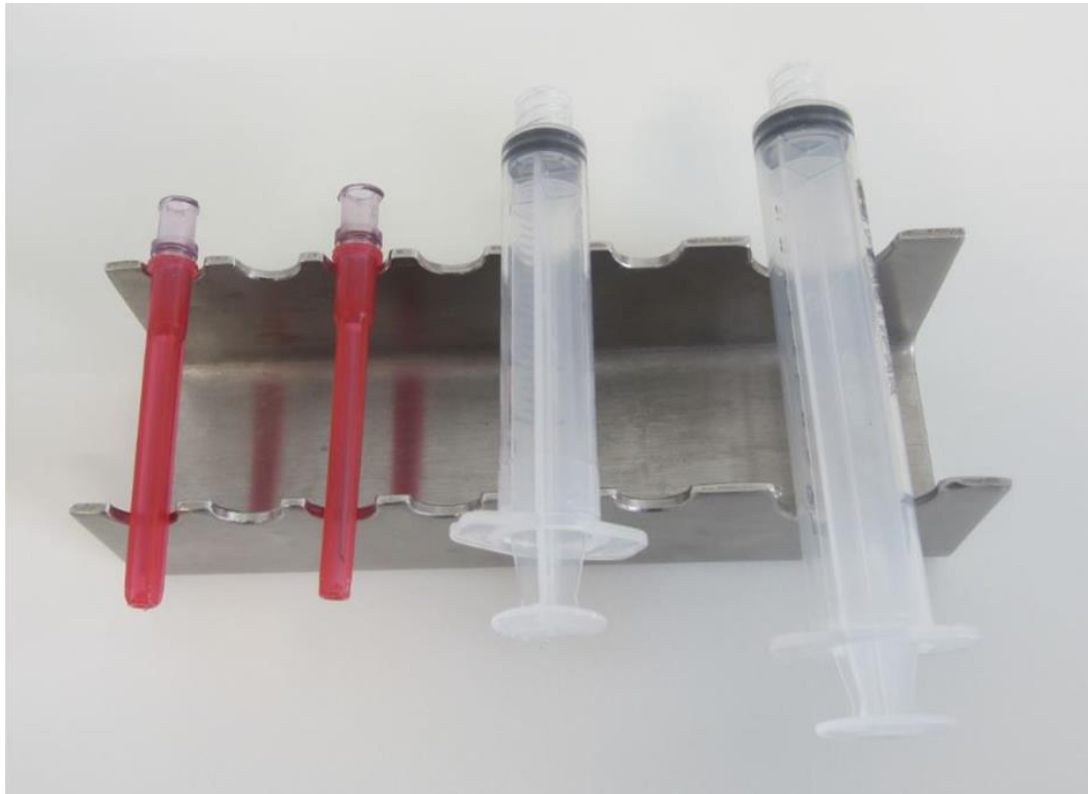

Supplement: inline-supplementary-material-5 [file inline-supplementary-material-5.pdf]
